# Supplementary material for: Changes in serum TIM-3 and complement C3 expression in workers due to Mn exposure
Source: PubMed Central journal article supplement (PMC10666638; doi:10.3389/fpubh.2023.1289838), 2023-11-09
Supplement: Data_Sheet_1.pdf [file Data_Sheet_1.pdf]

Supplementary table 1

Table 1 Concentrations of manganese and its inorganic compounds in the occupational environment (mg/m<sup>3</sup>)

| Shopfloor          | A Post | C-TWA       | PC-TWA | peak<br>concentration | 3 x PC-TWA |
|--------------------|--------|-------------|--------|-----------------------|------------|
| Welding            | Weld   | 0.001-0.127 | 0.150  | 0.010-0.292           | 0.450      |
| Contracting        | Weld   | 0.056-0.142 | 0.150  | 0.151-0.378           | 0.450      |
| Chassis            | Weld   | 0.065-0.131 | 0.150  | 0.029-0.210           | 0.450      |
| Manufacturing      | Weld   | 0.123-0.131 | 0.150  | 0.125-0.152           | 0.450      |
| Trial Production   | Weld   | 0.013-0.113 | 0.150  | 0.011-0.182           | 0.450      |
| Process Department | Weld   | 0.125       | 0.150  | 0.036-0.200           | 0.450      |

Supplementary table 2

Table 2 Association of demographic characteristics with WBCs and RBCs

| Variables        | WBCs( $10^9/L$ ) |                |               |                |                        | RBCs( $10^{12}/L$ ) |                |               |                |                  |
|------------------|------------------|----------------|---------------|----------------|------------------------|---------------------|----------------|---------------|----------------|------------------|
|                  | Low Mn group     |                | High Mn group |                | $F(P)^a$               | Low Mn group        |                | High Mn group |                | $F(P)^a$         |
|                  | n                | $\bar{x}\pm s$ | n             | $\bar{x}\pm s$ |                        | n                   | $\bar{x}\pm s$ | n             | $\bar{x}\pm s$ |                  |
| Age (years)      |                  |                |               |                |                        |                     |                |               |                |                  |
| ≤8               | 41               | 5.77±1.03      | 41            | 6.93±1.30      | 20.299<br>( $<0.001$ ) | 41                  | 5.26±0.43      | 41            | 5.24±0.36      | 0.239<br>(0.626) |
| >8               | 31               | 5.98±0.72      | 31            | 7.12±1.35      | 19.030<br>( $<0.001$ ) | 31                  | 5.22±0.31      | 31            | 5.27±0.34      | 0.304<br>(0.584) |
| $F(P)^b$         | 0.407(0.526)     |                | 0.243(0.623)  |                |                        | 0.182(0.671)        |                | 0.348(0.557)  |                |                  |
| Current smoking  |                  |                |               |                |                        |                     |                |               |                |                  |
| Yes              | 28               | 6.03±0.67      | 24            | 7.67±1.53      | 26.617<br>( $<0.001$ ) | 28                  | 5.23±0.34      | 24            | 5.22±0.39      | 0.024<br>(0.877) |
| No               | 44               | 5.75±1.03      | 48            | 6.69±1.07      | 16.488<br>( $<0.001$ ) | 44                  | 5.24±0.41      | 48            | 5.26±0.33      | 0.000<br>(0.995) |
| $F(P)^b$         | 1.179(0.281)     |                | 7.127(0.010)  |                |                        | 0.009(0.926)        |                | 0.168(0.684)  |                |                  |
| Drinking history |                  |                |               |                |                        |                     |                |               |                |                  |
| Yes              | 5                | 6.16±0.52      | 6             | 8.64±1.84      | 6.830<br>(0.040)       | 5                   | 5.06±0.20      | 6             | 5.22±0.48      | 0.198<br>(0.672) |
| No               | 67               | 5.83±0.93      | 66            | 6.87±1.17      | 32.279<br>( $<0.001$ ) | 67                  | 5.25±0.39      | 66            | 5.25±0.34      | 0.062<br>(0.803) |
| $F(P)^b$         | 0.273(0.603)     |                | 8.046(0.006)  |                |                        | 1.228(0.272)        |                | 0.191(0.663)  |                |                  |
| BMI              |                  |                |               |                |                        |                     |                |               |                |                  |
| 18.5-23.9        | 35               | 5.70±0.91      | 23            | 6.85±1.23      | 18.481<br>( $<0.001$ ) | 35                  | 5.20±0.40      | 23            | 5.08±0.31      | 1.386<br>(0.245) |
| 24.0-27.9        | 24               | 5.75±0.95      | 37            | 7.08±1.28      | 22.755<br>( $<0.001$ ) | 24                  | 5.21±0.34      | 37            | 5.31±0.36      | 1.083<br>(0.303) |
| ≥28.0            | 13               | 6.36±0.64      | 12            | 7.10±1.64      | 1.540<br>(0.229)       | 13                  | 5.38±0.42      | 12            | 5.39±0.27      | 0.005<br>(0.945) |
| $F(P)^b$         | 2.875(0.043)     |                | 0.601(0.551)  |                |                        | 0.770(0.515)        |                | 4.445(0.015)  |                |                  |

<sup>a</sup> denotes the difference between the low and high Mn groups for each indicator after stratification of the different variables; <sup>b</sup> denotes the difference between the low and high Mn groups within the low and high Mn groups for each indicator after stratification of the variables.

Supplementary table 3

Table 3 Association of demographic characteristics with Hb and PLT

| Variables                          | Hb(g/L)      |                |               |                |                                    | PLT (10 <sup>9</sup> /L) |                |               |                |                                    |
|------------------------------------|--------------|----------------|---------------|----------------|------------------------------------|--------------------------|----------------|---------------|----------------|------------------------------------|
|                                    | Low Mn group |                | High Mn group |                | <i>F</i> ( <i>P</i> ) <sup>a</sup> | Low Mn group             |                | High Mn group |                | <i>F</i> ( <i>P</i> ) <sup>a</sup> |
|                                    | n            | $\bar{x}\pm s$ | n             | $\bar{x}\pm s$ |                                    | n                        | $\bar{x}\pm s$ | n             | $\bar{x}\pm s$ |                                    |
| Age (years)                        |              |                |               |                |                                    |                          |                |               |                |                                    |
| ≤8                                 | 41           | 152.83±12.44   | 41            | 154.22±9.25    | 0.224<br>(0.637)                   | 41                       | 222.01±47.78   | 41            | 244.17±49.74   | 3.837<br>(0.054)                   |
| >8                                 | 31           | 154.00±8.34    | 31            | 153.74±8.51    | 0.118<br>(0.732)                   | 31                       | 217.01±48.94   | 31            | 242.59±47.36   | 5.184<br>(0.027)                   |
| <i>F</i> ( <i>P</i> ) <sup>b</sup> | 0.492(0.485) |                | 0.127(0.723)  |                |                                    | 0.441(0.509)             |                | 0.225(0.637)  |                |                                    |
| Current smoking                    |              |                |               |                |                                    |                          |                |               |                |                                    |
| Yes                                | 28           | 151.18±12.99   | 24            | 154.33±10.95   | 0.828<br>(0.367)                   | 28                       | 226.76±49.12   | 24            | 259.03±45.22   | 3.596<br>(0.061)                   |
| No                                 | 44           | 154.70±9.06    | 48            | 153.85±7.77    | 0.497<br>(0.483)                   | 44                       | 215.46±47.32   | 48            | 235.72±48.51   | 5.061<br>(0.029)                   |
| <i>F</i> ( <i>P</i> ) <sup>b</sup> | 1.944(0.168) |                | 0.031(0.861)  |                |                                    | 1.414(0.239)             |                | 3.717(0.058)  |                |                                    |
| Drinking history                   |              |                |               |                |                                    |                          |                |               |                |                                    |
| Yes                                | 5            | 151.60±7.89    | 6             | 156.17±9.97    | 0.181<br>(0.686)                   | 5                        | 203.28±35.83   | 6             | 254.05±39.71   | 9.343<br>(0.022)                   |
| No                                 | 67           | 153.46±11.03   | 66            | 153.82±8.84    | 0.002<br>(0.965)                   | 67                       | 221.10±48.78   | 66            | 242.53±49.25   | 6.037<br>(0.015)                   |
| <i>F</i> ( <i>P</i> ) <sup>b</sup> | 0.069(0.794) |                | 0.275(0.602)  |                |                                    | 0.904(0.345)             |                | 0.035(0.852)  |                |                                    |
| BMI                                |              |                |               |                |                                    |                          |                |               |                |                                    |
| 18.5-23.9                          | 35           | 153.56±9.75    | 23            | 151.87±7.82    | 0.418<br>(0.521)                   | 35                       | 210.96±48.89   | 23            | 231.45±39.76   | 2.667<br>(0.108)                   |
| 24.0-27.9                          | 24           | 152.38±11.64   | 37            | 154.19±8.73    | 0.293<br>(0.590)                   | 24                       | 229.64±49.55   | 37            | 251.73±56.23   | 3.209<br>(0.079)                   |
| ≥28.0                              | 13           | 154.38±12.93   | 12            | 157.58±10.68   | 0.447<br>(0.511)                   | 13                       | 228.98±40.47   | 12            | 241.15±32.71   | 0.384<br>(0.542)                   |
| <i>F</i> ( <i>P</i> ) <sup>b</sup> | 0.073(0.974) |                | 1.509(0.229)  |                |                                    | 1.250(0.299)             |                | 1.686(0.193)  |                |                                    |

<sup>a</sup> indicates differences in indicators between the low and high Mn groups after stratification of the different variables; <sup>b</sup> indicates differences in indicators within the low and high Mn groups after stratification of the variables.

Supplementary table 4

Table 4 Association of demographic characteristics with TIM-3 and complement C3

| Variables                 | TIM-3(pg/mL) |                        |               |                         |                           | 补体 C3(mg/mL) |                     |               |                     |                           |
|---------------------------|--------------|------------------------|---------------|-------------------------|---------------------------|--------------|---------------------|---------------|---------------------|---------------------------|
|                           | Low Mn group |                        | High Mn group |                         | $\chi^2$ (P) <sup>a</sup> | Low Mn group |                     | High Mn group |                     | $\chi^2$ (P) <sup>a</sup> |
|                           | n            | M(P25, P75)            | n             | M(P25, P75)             |                           | n            | M(P25, P75)         | n             | M(P25, P75)         |                           |
| Age (years)               |              |                        |               |                         |                           |              |                     |               |                     |                           |
| ≤8                        | 41           | 64.68<br>(56.95,86.85) | 41            | 80.34<br>(69.99,106.40) | 8.489<br>(0.004)          | 41           | 1.07<br>(0.82,1.26) | 41            | 0.92<br>(0.64,1.20) | 4.421<br>(0.036)          |
| >8                        | 31           | 62.30<br>(51.40,73.04) | 31            | 80.34<br>(63.75,98.25)  | 12.385<br>(<0.001)        | 31           | 1.12<br>(0.98,1.29) | 31            | 0.85<br>(0.60,1.22) | 14.678<br>(<0.001)        |
| $\chi^2$ (P) <sup>b</sup> |              | 3.592(0.058)           |               | 0.532(0.466)            |                           |              | 5.452(0.020)        |               | 0.942(0.332)        |                           |
| Current smoking           |              |                        |               |                         |                           |              |                     |               |                     |                           |
| Yes                       | 28           | 62.36<br>(51.92,73.91) | 24            | 70.97<br>(65.45,98.17)  | 4.785<br>(0.029)          | 28           | 1.04<br>(0.82,1.26) | 24            | 1.00<br>(0.62,1.23) | 0.947<br>(0.331)          |
| No                        | 44           | 65.25<br>(56.69,81.00) | 48            | 82.12<br>(66.27,102.28) | 13.626<br>(<0.001)        | 44           | 1.14<br>(1.00,1.29) | 48            | 0.88<br>(0.63,1.18) | 19.933<br>(<0.001)        |
| $\chi^2$ (P) <sup>b</sup> |              | 0.242(0.623)           |               | 0.797(0.372)            |                           |              | 5.825(0.016)        |               | 0.154(0.695)        |                           |
| Drinking history          |              |                        |               |                         |                           |              |                     |               |                     |                           |
| Yes                       | 5            | 62.89<br>(56.16,96.03) | 6             | 81.68<br>(66.67,96.47)  | 1.756<br>(0.185)          | 5            | 1.05<br>(0.63,1.16) | 6             | 1.22<br>(0.61,1.40) | 0.289<br>(0.591)          |
| No                        | 67           | 62.63<br>(53.82,77.50) | 66            | 79.91<br>(65.21,103.03) | 17.008<br>(<0.001)        | 67           | 1.10<br>(0.96,1.29) | 66            | 0.88<br>(0.63,1.17) | 19.866<br>(<0.001)        |
| $\chi^2$ (P) <sup>b</sup> |              | 0.366(0.545)           |               | 0.025(0.876)            |                           |              | 2.741(0.098)        |               | 1.854(0.173)        | $\chi^2$ (P) <sup>b</sup> |
| BMI                       |              |                        |               |                         |                           |              |                     |               |                     |                           |
| 18.5-23.9                 | 35           | 62.53<br>(51.05,86.83) | 23            | 85.89<br>(62.55,110.03) | 6.226<br>(0.013)          | 35           | 1.13<br>(0.98,1.30) | 23            | 0.77<br>(0.62,1.10) | 16.862<br>(<0.001)        |
| 24.0-27.9                 | 24           | 63.78<br>(57.21,72.35) | 37            | 78.16<br>(66.31,96.93)  | 10.789<br>(0.001)         | 24           | 1.05<br>(0.89,1.28) | 37            | 0.91<br>(0.62,1.22) | 4.777<br>(0.029)          |
| ≥28.0                     | 13           | 62.34<br>(53.99,89.75) | 12            | 81.00<br>(67.68,108.53) | 5.434<br>(0.020)          | 13           | 1.09<br>(0.94,1.27) | 12            | 1.12<br>(0.84,1.27) | 0.508<br>(0.476)          |
| $\chi^2$ (P) <sup>b</sup> |              | 0.573(0.902)           |               | 0.703(0.704)            |                           |              | 5.426(0.143)        |               | 3.734(0.155)        |                           |

<sup>a</sup> indicates differences in indicators between the low and high Mn groups after stratification of the different variables; <sup>b</sup> indicates differences in indicators within the low and high Mn groups after stratification of the variables.

## Supplementary table 5

Table 5 Analytical model of the mediating effect of complement C3 between RBC Mn and TIM-3

| Equation | Dependent variable | Independent variable | <i>B</i> | <i>R</i> <sup>2</sup> | <i>F</i> | <i>p</i> |
|----------|--------------------|----------------------|----------|-----------------------|----------|----------|
| Path c   | TIM-3              | RBC Mn               | 0.267    | 0.102                 | 3.132    | 0.01     |
| Path a   | C3                 | RBC Mn               | -0.339   | 0.134                 | 4.255    | 0.001    |
| Path b   | TIM-3              | C3                   | -0.183   | 0.131                 | 3.434    | 0.003    |
| Path c'  |                    | RBC Mn               | 0.205    |                       |          |          |
